# Supplementary material for: Carbon dioxide sequestration in natural gas hydrates – effect of flue and noble gases
Source: Royal Society of Chemistry journal article supplement (doi:10.1039/d3cp03777k), 2023-01-01
Supplement: d3cp03777k1.pdf [file d3cp03777k1.pdf]

## Supplementary Information

### Carbon Dioxide Sequestration in Natural Gas Hydrates – Effect of Flue and Noble Gases

Manju Sharma<sup>1\*</sup> and Satyam Singh<sup>1</sup>

<sup>1</sup> School of Chemistry, University of Hyderabad, Hyderabad, India 500 046

\* [manjusharma@uohyd.ac.in](mailto:manjusharma@uohyd.ac.in)

**Table S1:** Number of molecules in the initial configuration ( $t^* = 0$ ); in seed,  $N_{H_2O} = 3450$  and  $N_{CH_4} = 600$

| System                                  | $N_{CO_2,bulk}$ | $N_{G_3,bulk}$ | $N_{H_2O,bulk}$ | $N_{CH_4,Bulk}$ |
|-----------------------------------------|-----------------|----------------|-----------------|-----------------|
| Pure CH <sub>4</sub>                    | -               | -              | 3440            | 610             |
| Bulk CO <sub>2</sub>                    | 610             | -              | 3440            | 0               |
| H <sub>2</sub> S(3:1)                   | 458             | 152            | 3440            | 0               |
| N <sub>2</sub> (3:1)                    | 458             | 152            | 3440            | 0               |
| CO(3:1)                                 | 458             | 152            | 3440            | 0               |
| Ne (3:1)                                | 458             | 152            | 3440            | 0               |
| Ar(3:1)                                 | 458             | 152            | 3440            | 0               |
| Kr(3:1)                                 | 458             | 152            | 3440            | 0               |
| Xe(3:1)                                 | 458             | 152            | 3440            | 0               |
| H <sub>2</sub> S(1:1)                   | 306             | 304            | 3440            | 0               |
| N <sub>2</sub> (1:1)                    | 306             | 304            | 3440            | 0               |
| CO(1:1)                                 | 306             | 304            | 3440            | 0               |
| Ne (1:1)                                | 306             | 304            | 3440            | 0               |
| Ar(1:1)                                 | 306             | 304            | 3440            | 0               |
| Kr(1:1)                                 | 306             | 304            | 3440            | 0               |
| CO <sub>2</sub> :Ar(2.35:1.65)          | 358             | 252            | 3440            | 0               |
| CO <sub>2</sub> :Ar(2.5:1.5)            | 382             | 228            | 3440            | 0               |
| CO <sub>2</sub> :Ar(2.5:1.5)<br>(Large) | 632             | 378            | 5740            | 0               |

**Table S2:** Number of molecules in different systems after NVT simulations at 300K ( $t^* = 12\text{ns}$ )

| System                                       | $N_{CO_2,bulk}$ | $N_{G_3,bulk}$ | $N_{H_2O,bulk}$ | $N_{CH_4,Bulk}$ | $N_{H_2O,Seed}$ | $N_{CH_4,Seed}$ |
|----------------------------------------------|-----------------|----------------|-----------------|-----------------|-----------------|-----------------|
| Pure CH <sub>4</sub>                         | -               | -              | 4296            | 125             | 2594            | 475             |
| Bulk CO <sub>2</sub>                         | 563             | -              | 4375            | 167             | 2515            | 433             |
| H <sub>2</sub> S(3:1)                        | 433             | 143            | 4383            | 152             | 2507            | 448             |
| N <sub>2</sub> (3:1)                         | 443             | 142            | 4366            | 144             | 2524            | 456             |
| CO(3:1)                                      | 441             | 134            | 4349            | 152             | 2541            | 448             |
| Ne (3:1)                                     | 416             | 135            | 4392            | 169             | 2498            | 431             |
| Ar(3:1)                                      | 431             | 129            | 4373            | 171             | 2517            | 429             |
| Kr(3:1)                                      | 431             | 144            | 4387            | 155             | 2503            | 445             |
| Xe(3:1)                                      | 454             | 152            | 4384            | 128             | 2506            | 472             |
| H <sub>2</sub> S(1:1)                        | 302             | 302            | 4333            | 150             | 2557            | 450             |
| N <sub>2</sub> (1:1)                         | 301             | 300            | 4321            | 149             | 2569            | 451             |
| CO(1:1)                                      | 300             | 300            | 4321            | 147             | 2569            | 453             |
| Ne (1:1)                                     | 305             | 291            | 4383            | 153             | 2507            | 447             |
| Ar(1:1)                                      | 303             | 298            | 4349            | 154             | 2541            | 446             |
| Kr(1:1)                                      | 303             | 300            | 4339            | 147             | 2551            | 453             |
| CO <sub>2</sub> :Ar(2.35:1.65)               | 356             | 244            | 4359            | 147             | 2531            | 453             |
| CO <sub>2</sub> :Ar(2.5:1.5)                 | 380             | 228            | 4339            | 150             | 2551            | 450             |
| CO <sub>2</sub> :Ar(2.5:1.5)<br>(Large size) | 614             | 363            | 6676            | 158             | 2514            | 442             |

**Table S3:** Box dimensions ( $\text{\AA}^3$ ) in different systems at 2ns and 60ns of NPT simulations at 250K and 15MPa. The NPT simulations in larger system size for Ar(2.5:1.5), L(Ar(2.5:1.5)) were simulated for 80ns.

| System                | Box dimension ( $\text{\AA}^3$ ) t = 2ns | Box dimension ( $\text{\AA}^3$ ) t = 60ns |
|-----------------------|------------------------------------------|-------------------------------------------|
| Pure CH <sub>4</sub>  | 60.1071 x 60.1071 x 73.3492              | 59.8692 x 59.8692 x <b>73.0590</b>        |
| Pure CO <sub>2</sub>  | 59.8412 x 59.8412 x 71.7072              | 59.7240 x 59.7240 x 71.5666               |
| Pure H <sub>2</sub> S | 59.7444 x 59.7444 x 71.7036              | 59.6494 x 59.6494 x 71.5896               |
| Bulk CO <sub>2</sub>  | 59.9718 x 59.9718 x 71.7296              | 59.8384 x 59.8384 x 71.57                 |
| H <sub>2</sub> S(3:1) | 59.9926 x 59.9926 x 72.0016              | 59.8360 x 59.9926 x 71.8136               |
| N <sub>2</sub> (3:1)  | 59.7720 x 59.7720 x 71.9116              | 59.7784 x 59.7784 x 71.9192               |
| CO(3:1)               | 59.8762 x 59.8762 x 71.8618              | 59.7408 x 59.7408 x 71.6992               |
| H <sub>2</sub> S(1:1) | 60.1574 x 60.1574 x 72.1994              | 59.9854 x 59.9854 x 71.9928               |
| N <sub>2</sub> (1:1)  | 59.9402 x 59.9402 x 72.5632              | 59.7982 x 59.7982 x <b>72.3910</b>        |
| CO(1:1)               | 59.9992 x 59.9992 x 72.6344              | 59.9570 x 59.9570 x <b>72.5834</b>        |
| Ne (3:1)              | 59.7022 x 59.7022 x 71.6528              | 59.7898 x 59.7898 x 71.7582               |
| Ar(3:1)               | 59.9840 x 59.9840 x 71.9912              | 59.9476 x 59.9476 x 71.9476               |
| Kr(3:1)               | 59.9716 x 59.9716 x 71.9762              | 59.7680 x 59.7680 x 71.732                |
| Xe(3:1)               | 60.0512 x 60.0512 x 72.0718              | 59.7724 x 59.7724 x 71.7372               |
| Ne (1:1)              | 59.6730 x 59.6730 x 71.6178              | 59.7186 x 59.7186 x 71.6726               |
| Ar(1:1)               | 60.1162 x 60.1162 x 72.1496              | 59.8520 x 59.8520 x 71.8326               |
| Kr(1:1)               | 60.0788 x 60.0788 x 72.1050              | 59.9480 x 59.9480 x 71.9478               |
| Ar(2.5:1.5)           | 60.0644 x 60.0644 x 72.0876              | 59.8873 x 59.8873 x 71.8750               |
| Ar(2.35:1.65)         | 59.9294 x 59.9294 x 71.9258              | 59.8820 x 59.8820 x 71.8686               |
| L(Ar(2.5:1.5))        | 60.2726 x 60.2726 x 96.436               | 59.8020 x 59.8020 x 95.6834               |

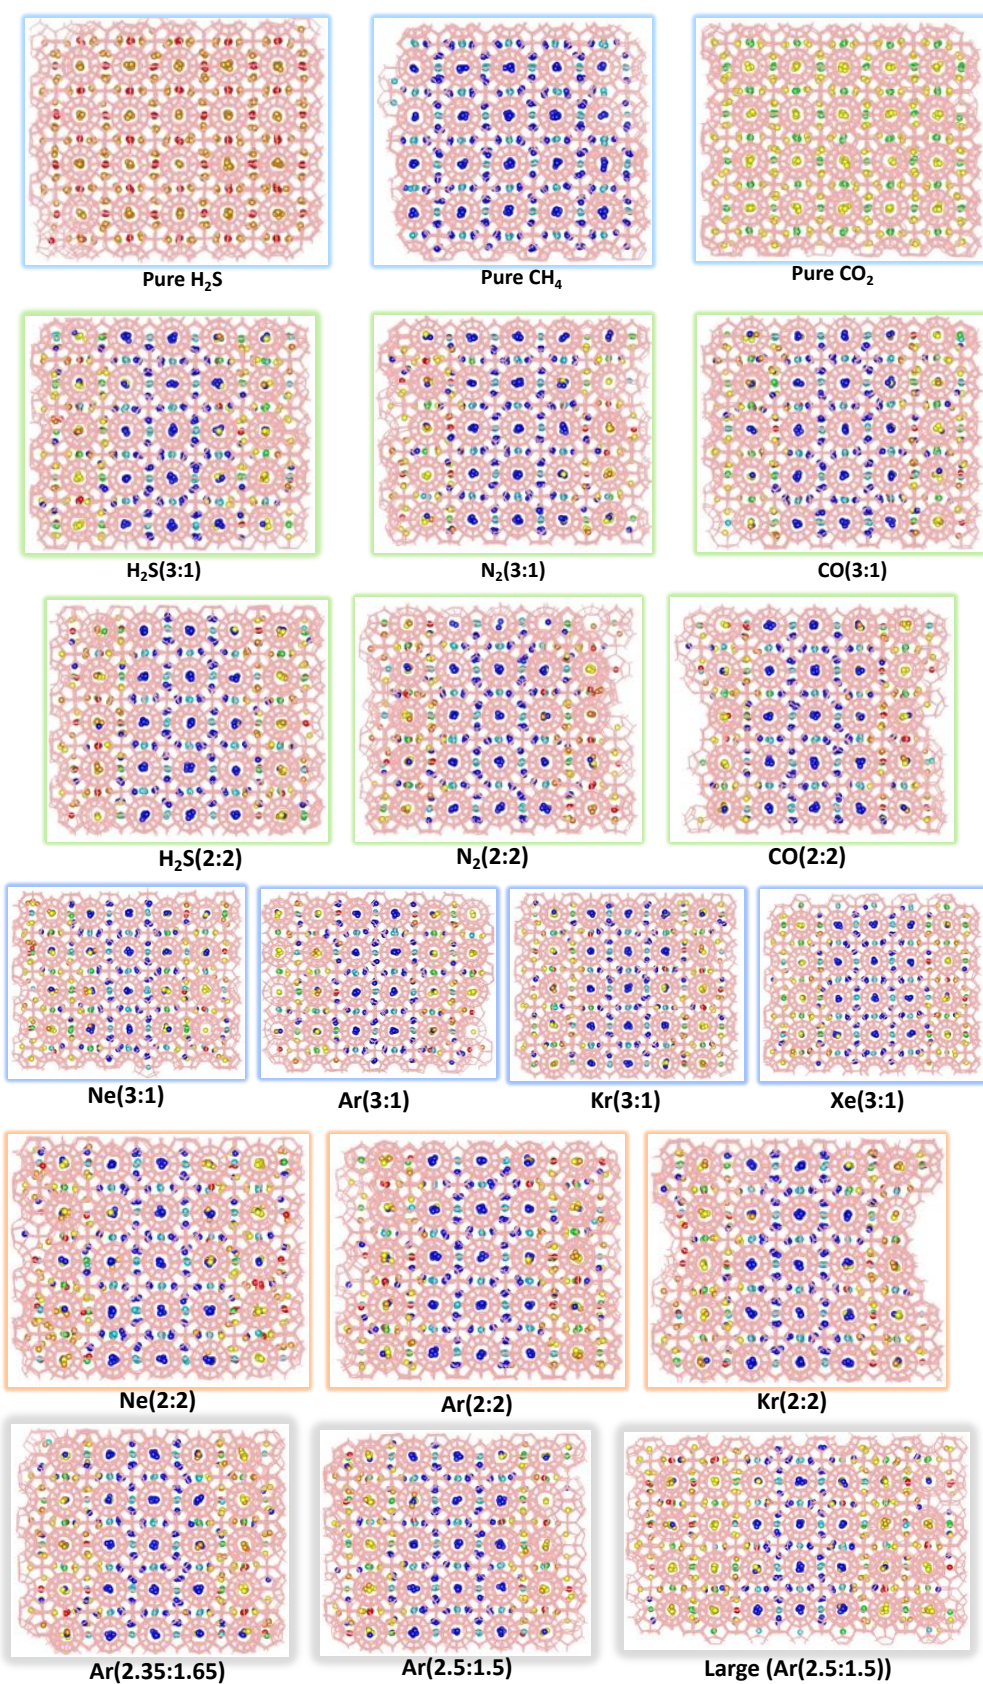

Fig S1: Snapshots of z-axis view of the trajectories of final configurations (60ns, NPT simulation) in different systems; the center of mass of all the gases are shown in the trajectories based on type of cage occupied; cyan (methane in SC), blue (methane in LC), green (carbon dioxide in SC), yellow (carbon dioxide in LC), red (H<sub>2</sub>S in SC of pure H<sub>2</sub>S system or third gas in SC in third gas systems) and orange (H<sub>2</sub>S in LC of pure H<sub>2</sub>S system or third gas in LC in third gas systems).

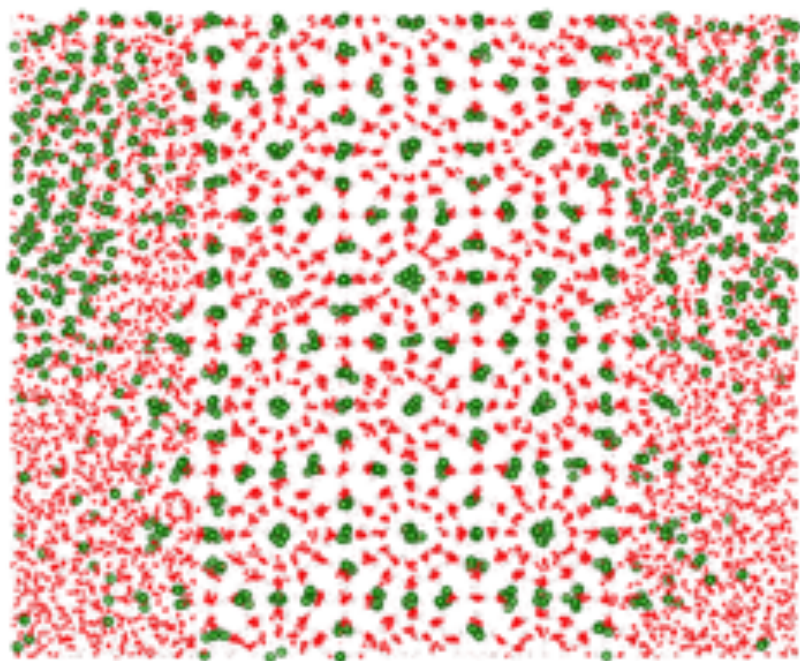

Figure S2: Snapshot of cluster of methane molecule in bulk phase in the final configuration of pure  $\text{CH}_4$  system at the end of NVT simulations at 300K; green spheres represent the center of mass of methane molecules.

**Table S4:** Induction time for formation of first layer besides the interface (Left side of interface,  $t_{L1}$  and Right side of interface,  $t_{R1}$ ). First layer formation time ( $t_{L1}$  or  $t_{R1}$ ) is calculated when F4 OP reaches 0.7 for the Left or Right side first layers; in case of systems that have slightly distorted cages, F4 OP is between 0.69 – 0.70 and F4 OP values for those systems are given in the table and total time  $t_{tot}$  (ns) as the time for complete hydrate growth in a system. {Average of  $t_{L1}$  and  $t_{R1}$  gives  $t_{ind}$  (which is reported in Figure 1)}.

| <b>System</b>                           | <b><math>t_{L1}</math>, ns</b> | <b><math>t_{R1}</math>, ns</b> | <b><math>t_{tot}</math>, ns (F4 OP)</b> |
|-----------------------------------------|--------------------------------|--------------------------------|-----------------------------------------|
| (CH <sub>4</sub> ) <sub>P</sub>         | 11.79                          | 12.91                          | 56.69 (0.666)                           |
| (CO <sub>2</sub> ) <sub>P</sub>         | 19.10(0.68)                    | 15.56(0.68)                    | 25.39(0.67)                             |
| (H <sub>2</sub> S) <sub>P</sub>         | 5.31                           | 1.79                           | 21.13(0.7)                              |
| (CO <sub>2</sub> ) <sub>B</sub>         | 21.570                         | 36.78                          | 48.98(0.698)                            |
| H <sub>2</sub> S(3:1)                   | 23.48                          | 34.19                          | 58.11(0.699)                            |
| N <sub>2</sub> (3:1)                    | 29.0                           | 35.0                           | 44.37(0.692)                            |
| CO(3:1)                                 | 49.0(0.698)                    | 27.0                           | 51.82(0.7)                              |
| H <sub>2</sub> S(2:2)                   | 14.63                          | 14.16                          | 57.78(0.697)                            |
| N <sub>2</sub> (2:2)                    | 30.0                           | 49.0                           | 58.56(0.655)                            |
| CO(2:2)                                 | 39.0                           | 42.0                           | 57.51(0.665)                            |
| Ne (3:1)                                | 25.71                          | 40.46(0.67)                    | 41.35(0.694)                            |
| Ar(3:1)                                 | 36.64                          | 27.86                          | 53.55(0.675)                            |
| Kr(3:1)                                 | 32.11                          | 13.26                          | 45.05(0.695)                            |
| Xe(3:1)                                 | 17.23                          | 10.14                          | 29.32(0.70)                             |
| Ne (2:2)                                | 34.32                          | 25.20                          | 45.19(0.70)                             |
| Ar(2:2)                                 | 24.02                          | 25.26                          | 52.08(0.70)                             |
| Kr(2:2)                                 | 26.06                          | 41.66                          | 50.98(0.68)                             |
| Ar(2.5:1.5)                             | 26.83                          | 38.74                          | 57.25(0.665)                            |
| Ar(2.35:1.65)                           | 27.40                          | 30.33                          | 57.74(0.68)                             |
| L(Ar(2.5:1.5))<br>1 <sup>st</sup> layer | 21.35                          | 30.20                          | 76.70(0.68)                             |
| L(Ar(2.5:1.5))<br>2 <sup>nd</sup> layer | 54.46                          | 69.49                          |                                         |

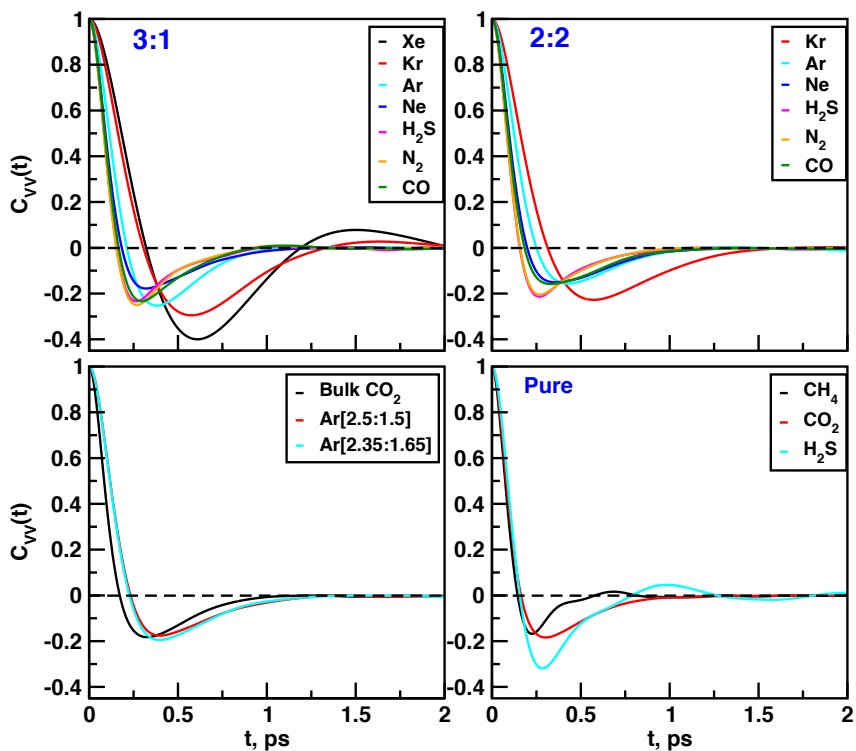

Figure S3: Velocity autocorrelation function plot of gases in different systems at 250K and 15MPa.

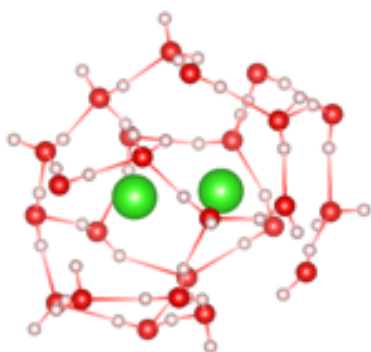

Figure S4: Snapshot of double occupancy of Ne atoms (green sphere) in large cage of hydrate (observed both in Ne(3:1) and Ne(2:2) systems).

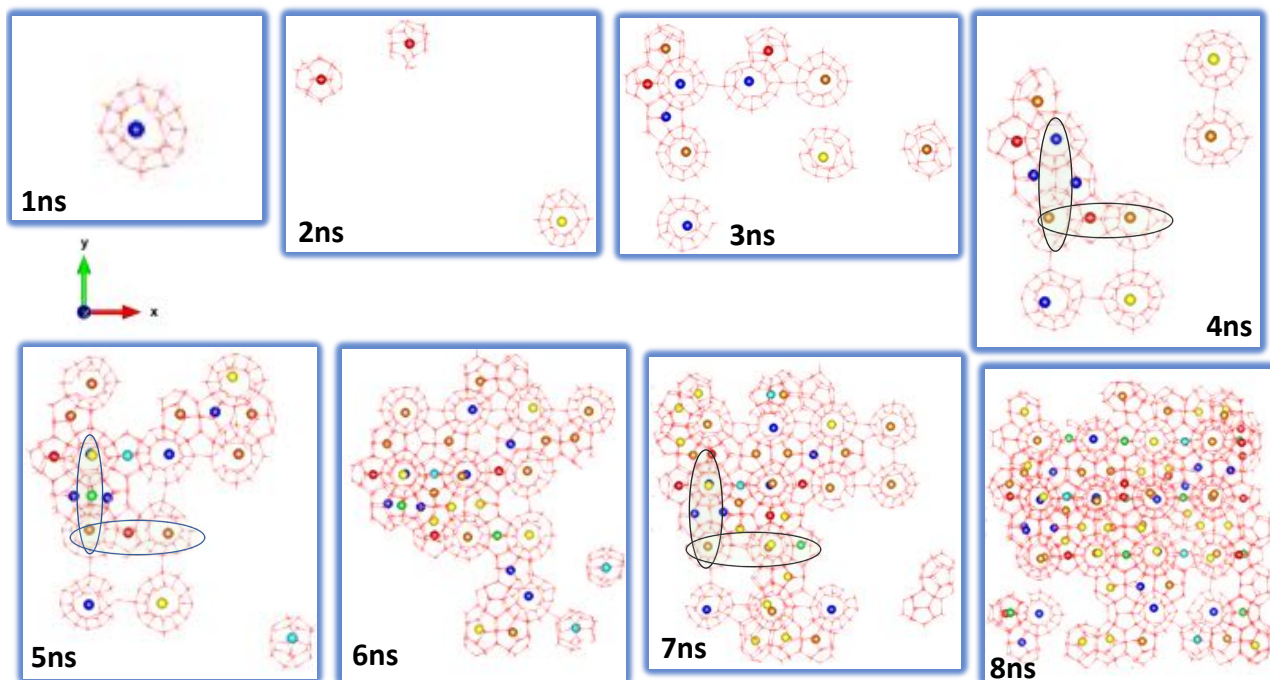

Figure S5: Snapshots of cages formed during NPT simulations in right side of interface in  $\text{H}_2\text{S}(2:2)$  system; cyan, blue, green, yellow, red and orange represent  $\text{CH}_4$  in SC,  $\text{CH}_4$  in LC,  $\text{CO}_2$  in SC,  $\text{CO}_2$  in LC,  $\text{H}_2\text{S}$  in SC and  $\text{H}_2\text{S}$  in LC. Large cage of  $\text{CH}_4$  formed at 1ns disappears at 2ns; Ovals represent the growth synthon.

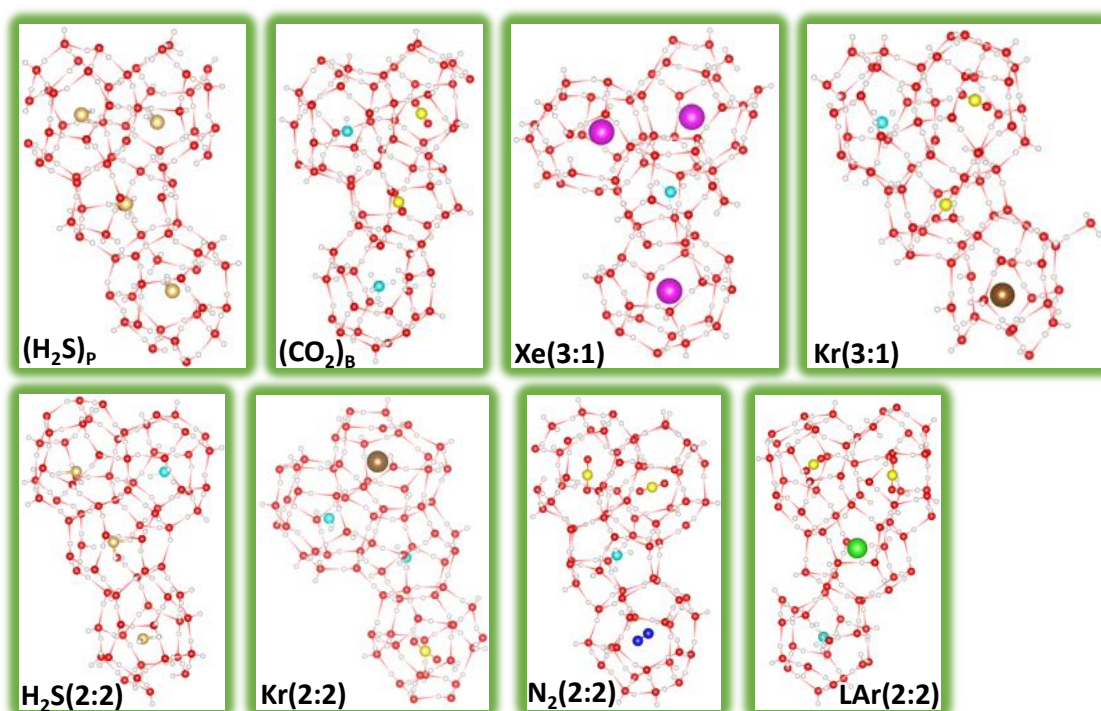

Figure S6: Growth synthon in different systems; here white, red, cyan, magenta, brown, green, yellow, mustard brown and blue spheres represent H, O, C, Xe, Kr, Ar, C( $\text{CO}_2$ ), S and N.



(a)  $t^* = 0\text{ns}$

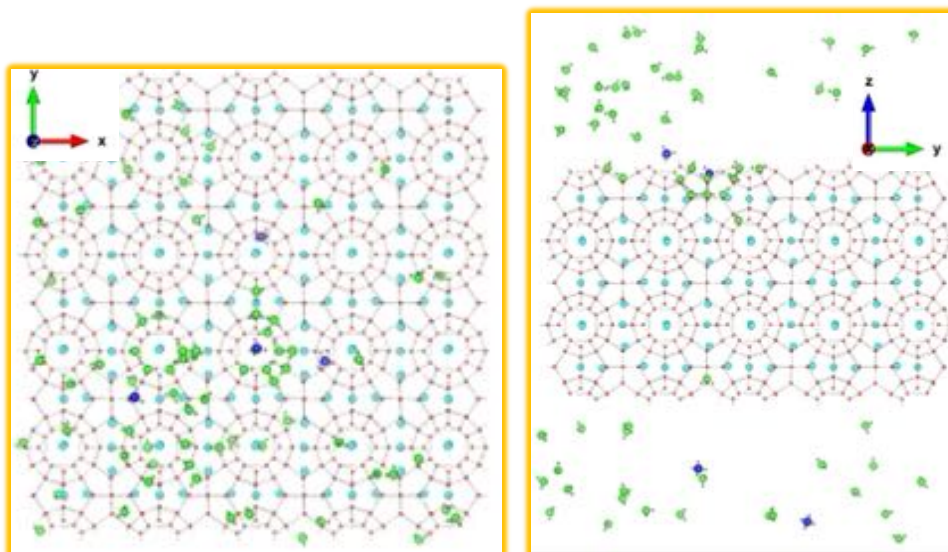

(b)  $t^* = 12\text{ns}$

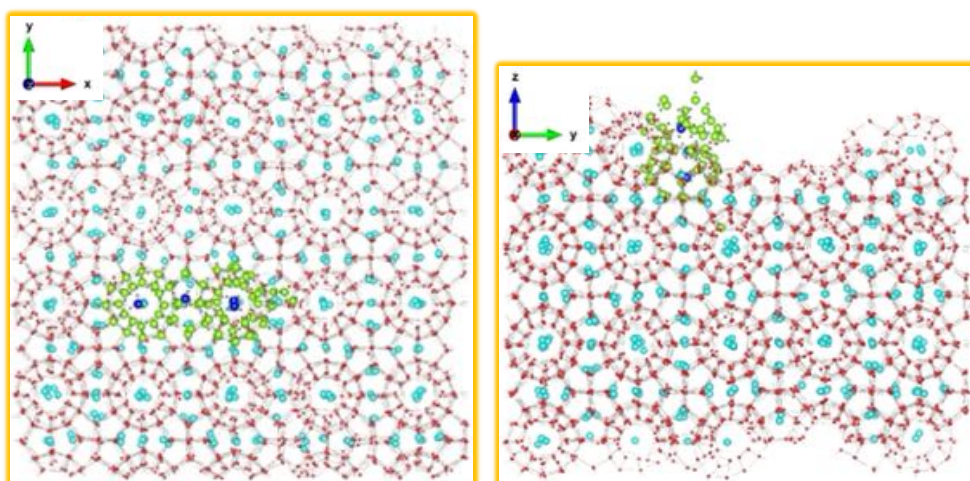

(c)  $t^* = 16\text{ns}$

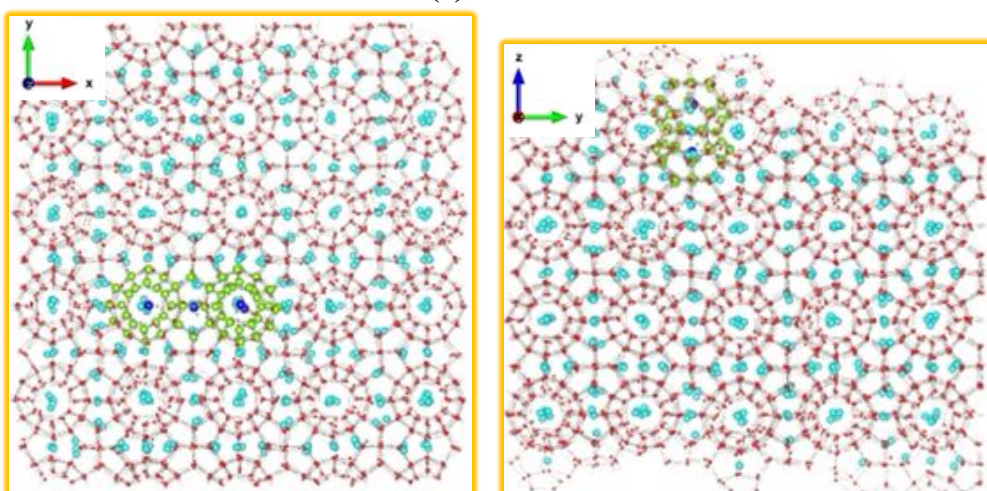

Figure S7: Trajectories of formation of growth synthon in pure  $\text{CH}_4$  system at different times,  $t^*$  (a) 0ns, (b) 12ns and (c) 16ns (two different views of same trajectory reported for each of the  $t^*$ ). Red sphere represents oxygen of water molecules that formed cages of hydrate seed at beginning of simulation ( $t^* = 0$ ) and green sphere represents oxygen of water molecules in bulk phase that later form hydrate cage of the growth synthon; similarly cyan sphere represents carbons of methane in hydrate seed in the initial configuration ( $t^* = 0$ ) and dark blue sphere represents methane in the bulk phase that later form the growth synthon.

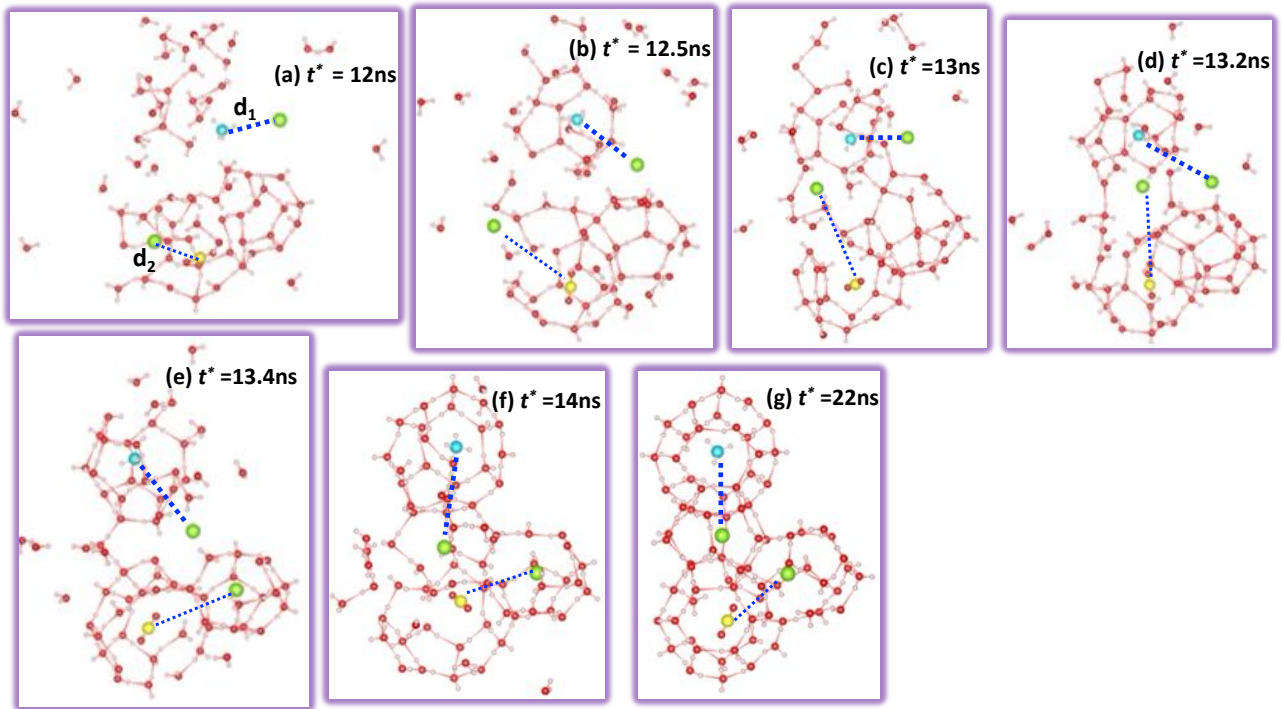

Figure S8: Trajectory of Ar(2:2) system during hydrate growth formation;  $d_1$  and  $d_2$  are distances between gas species that form the growth synthon; ( $d_1$  is distance between  $\text{CH}_4$  and Ar) and ( $d_2$  is distance between  $\text{CO}_2$  and Ar) respectively where  $d_1$  and  $d_2$  are (a) 6.29 Å and 4.07 Å at  $t^* = 12\text{ns}$ , (b) 6.79 Å and 4.07 Å at  $t^* = 12.5\text{ns}$ , (c) 5.8 Å and 9.69 Å at  $t^* = 13\text{ns}$ , (d) 9.1 Å and 8.96 Å at  $t^* = 13.2\text{ns}$ , (e) 7.1 Å and 8.39 Å at  $t^* = 13.4\text{ns}$ , (f) 7.67 Å and 6.79 Å at  $t^* = 14\text{ns}$  and (g) 6.8 Å and 7.2 Å at  $t^* = 22\text{ns}$ .

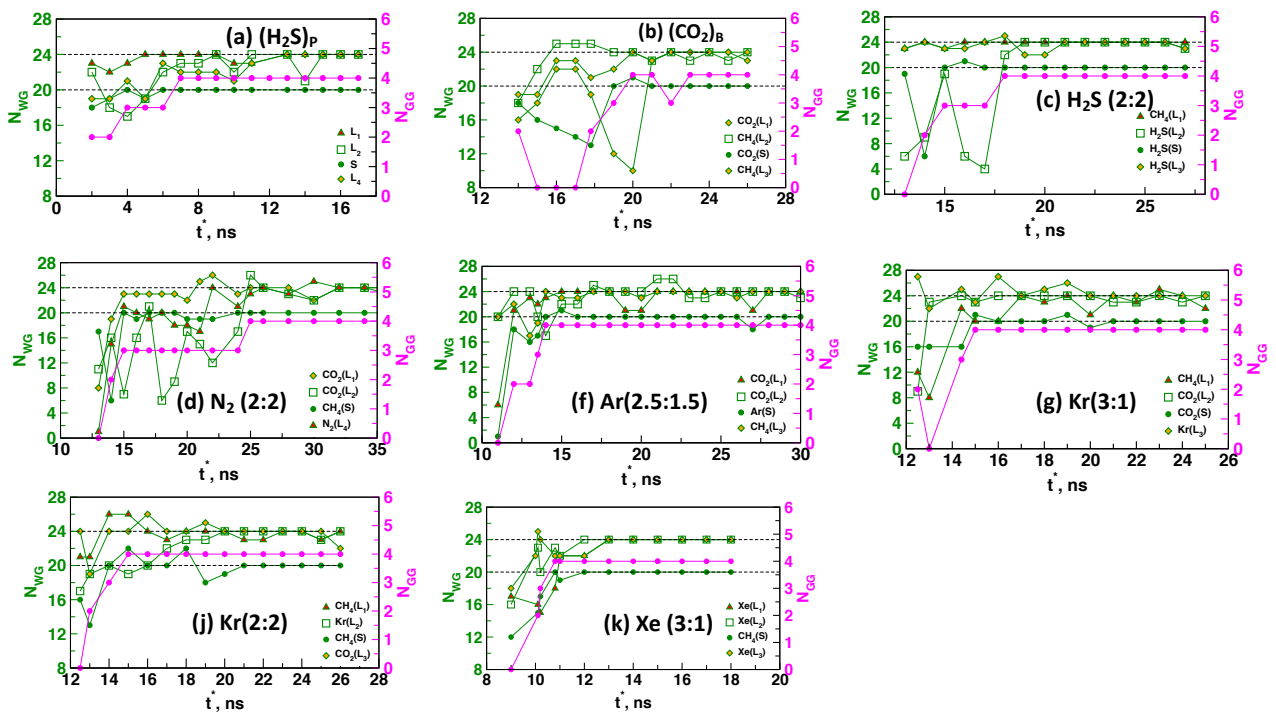

Figure S9: Number of water molecules around a guest ( $N_{\text{GW}}$ ) and number of guest molecules ( $N_{\text{GG}}$ ) within a distance of 8 Å in a growth synthon.

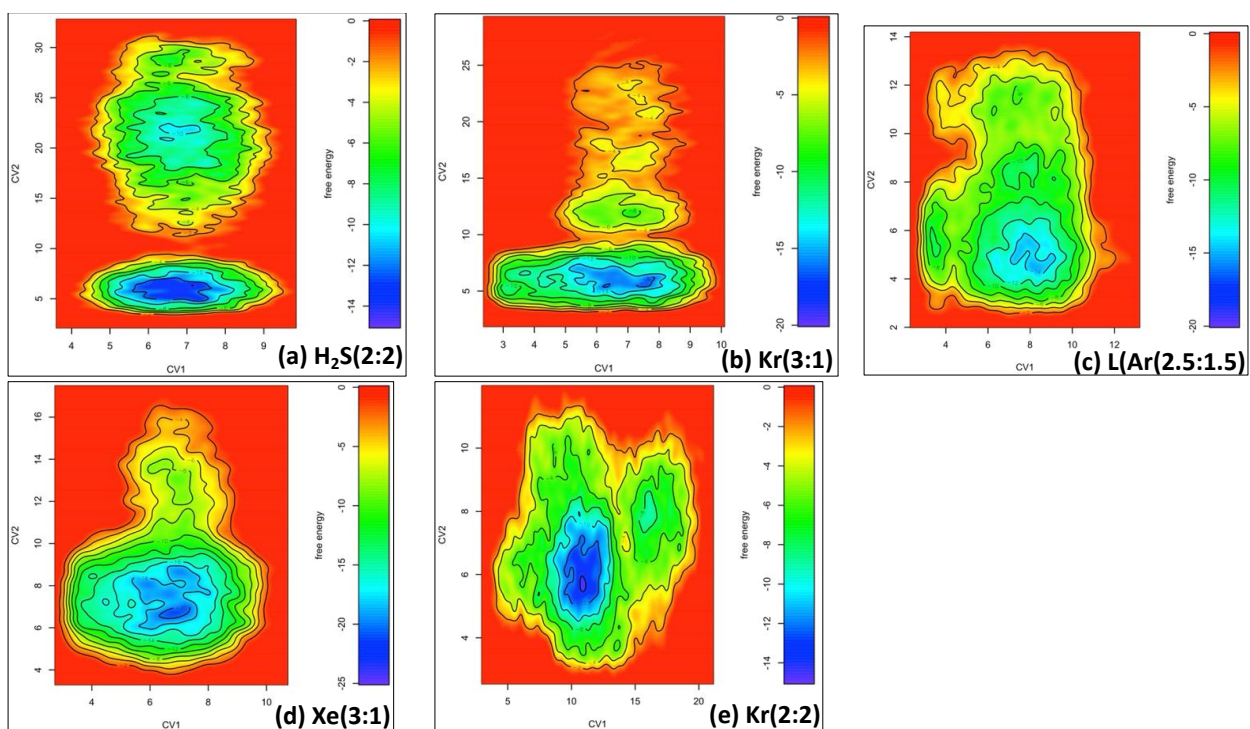

Figure S10: Free energy profiles as a function of collective variable CV1 (distance between guests in SL cage) and CV2 (distance between guests in LL cage).

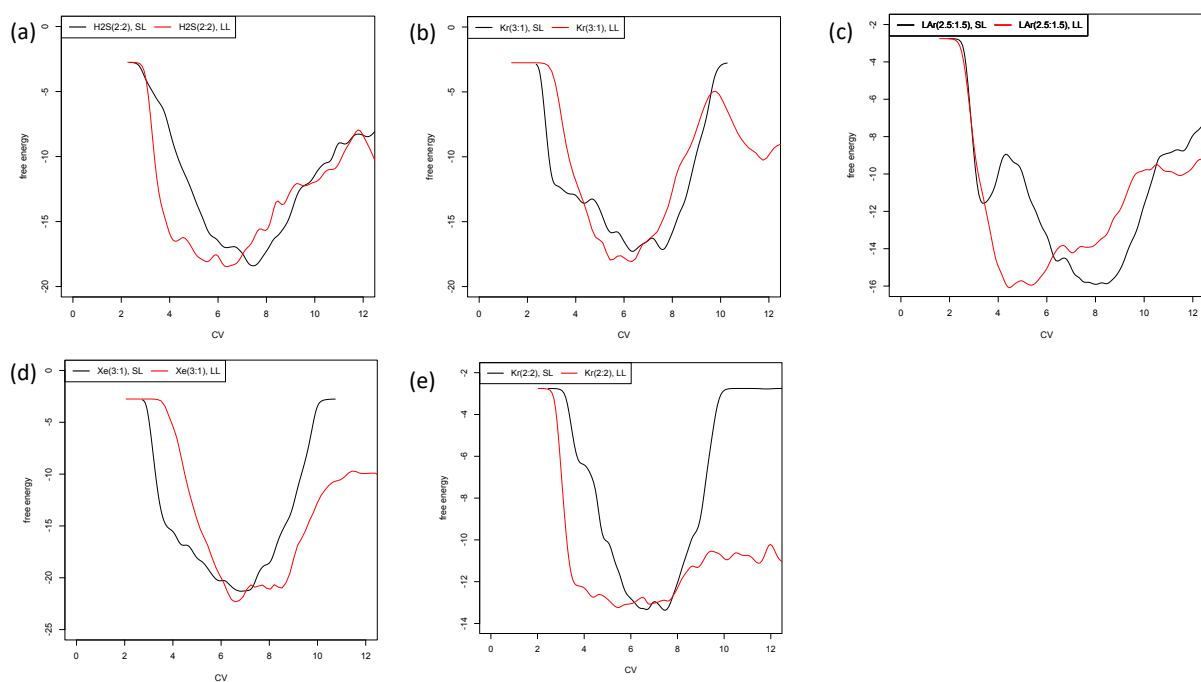

Figure S11: Free energy, kcal/mol vs CV1 (distance between two guests in SL cage, Å) or CV2 (distance between two guests in LL cage, Å) in different systems.

Table S5: Zero-point corrected DFT Gibbs Free Energy( $\Delta G_{DC}$ ) for different combination of gas species in SLDC; SL dual cages (S - small, L - large).

| Type (S/L)       | CH <sub>4</sub>                  | H <sub>2</sub> S                | N <sub>2</sub>                   | CO                       | Ne                                 | Ar                                 | Kr                                 | Xe                                 | CO <sub>2</sub>                          |
|------------------|----------------------------------|---------------------------------|----------------------------------|--------------------------|------------------------------------|------------------------------------|------------------------------------|------------------------------------|------------------------------------------|
| CH <sub>4</sub>  | -0.1449                          | 0.3846                          | 7.4484                           | 7.6455                   | 6.2719                             | 7.4886                             | 8.0935                             | 9.7175                             | 2.7120(XY)<br>4.8725(YZ)                 |
| H <sub>2</sub> S | -5.6381                          | -3.4105                         |                                  |                          |                                    |                                    |                                    |                                    | -1.3196(P)<br>1.4251(T)                  |
| N <sub>2</sub>   | 1.3617                           |                                 | 10.2791                          |                          |                                    |                                    |                                    |                                    | 5.8301(P)<br>6.4871(T)                   |
| CO               | -0.0169                          |                                 |                                  | 6.5687(AP)<br>7.3123(P)  |                                    |                                    |                                    |                                    | 6.6176(P)<br>5.0564(T)                   |
| Ne               | 5.8565                           |                                 |                                  |                          | 8.9419                             |                                    |                                    |                                    | 8.6971(XY)<br>8.1506(YZ)                 |
| Ar               | 6.3202                           |                                 |                                  |                          |                                    | 10.4485                            |                                    |                                    | 10.9361(XY)<br>11.5372(YZ)               |
| Kr               | 5.0526                           |                                 |                                  |                          |                                    |                                    | 14.3283                            |                                    | 11.3759(XY)<br>9.3968(YZ)                |
| Xe               | 8.7649                           |                                 |                                  |                          |                                    |                                    |                                    | 17.6428                            | 15.2683(XY)<br>13.4555(YZ)               |
| CO <sub>2</sub>  | 9.8781<br>(XY)<br>8.0665<br>(YZ) | 5.7466<br>(P)<br>10.0149<br>(T) | 16.8653<br>(P)<br>13.7247<br>(T) | 12.5481(P)<br>14.9320(T) | 18.1730<br>(XY)<br>17.2694<br>(YZ) | 16.9193<br>(XY)<br>16.2661<br>(YZ) | 19.6702<br>(XY)<br>17.0071<br>(YZ) | 19.3879<br>(XY)<br>16.2221<br>(YZ) | 12.2237(XY)<br>10.7353(YZ)<br>10.7472(P) |

XY - orientation of molecules represented that both the molecules perpendicular to each other, where large cage guest molecule was parallel to shared pentagonal face, however, small cage guest molecule was perpendicular to shared pentagonal face.

YZ - orientation of molecules represented that both the molecules perpendicular to each other, where, small cage guest molecule was parallel to shared pentagonal face, however, large cage guest molecule was perpendicular to shared pentagonal face.

P - orientation represented that both the molecules were parallel to each other.

T - represented the T shape orientation (perpendicular to each other) of guest molecules, where a guest molecule was parallel to shared pentagonal face, however, other was perpendicular to shared pentagonal face.

AP - represented that both molecules were parallel and opposite in orientation to each other.

Table S6: Zero-point corrected DFT Gibbs Free Energy( $\Delta G_{DC}$ ) for different combination of gas species in LLDC;

LL dual cages (L - large).

| Type (L/L)       | CH <sub>4</sub> | H <sub>2</sub> S | N <sub>2</sub> | CO                     | Ne      | Ar      | Kr     | Xe     | CO <sub>2</sub>          |
|------------------|-----------------|------------------|----------------|------------------------|---------|---------|--------|--------|--------------------------|
| CH <sub>4</sub>  | -4.2049         | -6.7023          | 0.8252         | -1.4840                | 2.4428  | 2.6713  | 3.8108 | 5.5145 | 3.7142(H)<br>0.3294(T)   |
| H <sub>2</sub> S |                 | -8.6702          |                |                        |         |         |        |        | -0.0734(T)<br>-5.1995(P) |
| N <sub>2</sub>   |                 |                  | 7.8971         |                        |         |         |        |        | 3.3634(P)<br>7.3888(T)   |
| CO               |                 |                  |                | 5.394(P)<br>4.4339(AP) |         |         |        |        | 4.0179(P)<br>5.0896(T)   |
| Ne               |                 |                  |                |                        | 13.0313 |         |        |        | 11.6483(H)<br>9.6742(T)  |
| Ar               |                 |                  |                |                        |         | 12.5563 |        |        | 12.7935(H)<br>9.7633(T)  |
| Kr               |                 |                  |                |                        |         |         | 9.6723 |        | 11.8692(H)<br>10.1178(T) |
| Xe               |                 |                  |                |                        |         |         |        | 14.865 | 12.7552(H)<br>11.7179(T) |
| CO <sub>2</sub>  |                 |                  |                |                        |         |         |        |        | 6.4482(T)<br>3.1331(P)   |

T represents the T shape orientation (perpendicular to each other) of guest molecules, where a guest molecule was parallel to shared hexagonal face, however, other was perpendicular to shared pentagonal face.

H represents the H shape orientation (parallel to each other) of guest molecules, where both the guest molecules were parallel to shared hexagonal face.

P orientation represents that both the molecules were parallel to each other.

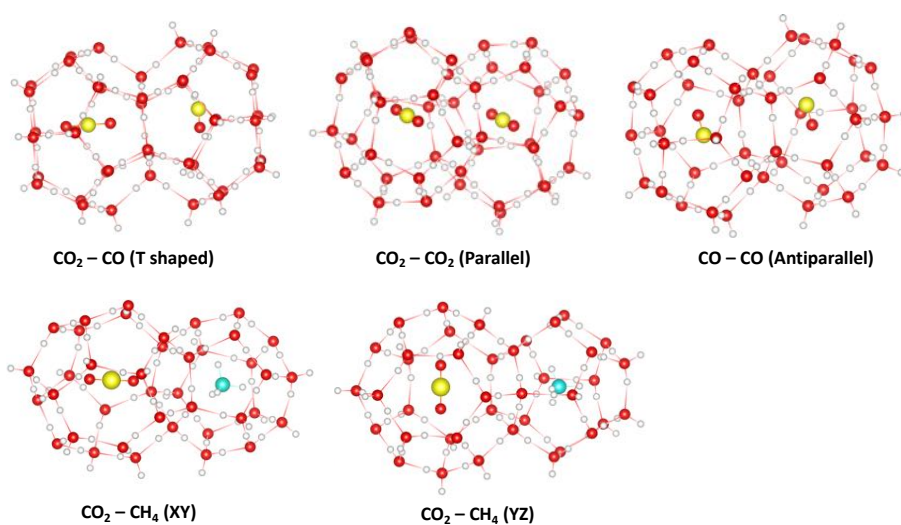

Figure S12: Different orientations chosen for gas species in dual cages for DFT free energy calculations.

**LAMMPS Input file for bulk CO<sub>2</sub> system (here User.data file is the configuration file as per LAMMPS format).**

```
newton on
boundary p p p

      atom_style      full

      bond_style      harmonic

      angle_style     harmonic

      dihedral_style  none

      read_data       H2O_ User.data

      pair_style hybrid lj/cut/coul/long 12.0 10.0  lj/cut/tip4p/long 5 4 3 2
0.1546 12.0 10.0

      group H2O type 5 4

kpspace_style      ppm/tip4p 1.0e-04

pair_coeff 1 1 lj/cut/coul/long 0.06600 3.50000
pair_coeff 2 2 lj/cut/coul/long 0.05590 2.80000
pair_coeff 3 3 lj/cut/coul/long 0.03000 2.50000
pair_coeff 4 4 lj/cut/tip4p/long 0.00000 0.00000
pair_coeff 5 5 lj/cut/tip4p/long 0.18520 3.15890
pair_coeff 6 6 lj/cut/coul/long 0.15970 3.02800
pair_coeff 1 2 lj/cut/coul/long 0.06074 3.15000
pair_coeff 1 3 lj/cut/coul/long 0.04450 3.00000
pair_coeff 1 4 lj/cut/coul/long 0.00000 1.75000
pair_coeff 1 5 lj/cut/coul/long 0.11056 3.32945
pair_coeff 1 6 lj/cut/coul/long 0.10267 3.26400
pair_coeff 2 3 lj/cut/coul/long 0.04095 2.65000
pair_coeff 2 4 lj/cut/coul/long 0.00000 1.40000
pair_coeff 2 5 lj/cut/coul/long 0.10175 2.97945
pair_coeff 2 6 lj/cut/coul/long 0.09448 2.91400
pair_coeff 3 4 lj/cut/coul/long 0.00000 1.25000
pair_coeff 3 5 lj/cut/coul/long 0.07454 2.82945
pair_coeff 3 6 lj/cut/coul/long 0.06922 2.76400
pair_coeff 4 5 lj/cut/tip4p/long 0.00000 1.57945
pair_coeff 4 6 lj/cut/coul/long 0.00000 1.51400
pair_coeff 5 6 lj/cut/coul/long 0.17198 3.09345
pair_modify tail no

velocity all create 250.0 6928459 rot yes dist gaussian

neighbor 2.0 bin
neigh_modify delay 0 every 1 check yes

thermo 1000
thermo_style multi

restart 1000 renew

dump 3 all xyz 1000 dump_0.5fs.xyz

min_style sd
minimize 1.0e-8 1.0e-9 100000 1000000

min_style sd
min_modify dmax 0.005
minimize 1.0e-8 1.0e-9 100000 1000000
```

```

min_style sd
min_modify dmax 0.005
minimize 1.0e-8 1.0e-9 100000 1000000
min_style sd
fix 1 H2O shake 0.0001 20 10 b 3 a 2

timestep 1.0
fix 11 all nvt temp 250.0 250.0 60.0
run 2000000
unfix 11

timestep 1.0
fix 11 all nvt temp 300.0 300.0 60.0 #iso 148.038 148.038 2000
run 10000000

```

+++++

### G09 input file (LLDC with CH<sub>4</sub> as gas species)

```

%chk=opt.chk
#b3lyp/cc-pVDZ freq

```

Title Card Required

```

0 1
O 13.743904 13.765982 13.807000
H 13.413082 12.971174 14.303058
H 14.260877 13.424586 13.030784
O 11.648004 15.247764 12.989533
H 11.688442 15.373376 12.009270
H 12.408649 14.659792 13.240060
O 11.569337 17.451729 14.549867
H 11.577819 16.621132 14.008142
H 12.402491 17.461954 15.094380
O 9.502487 21.151421 13.731703
H 8.899642 20.587967 14.294575
H 10.255231 20.560778 13.462700
O 11.597806 19.652790 12.989882
H 11.585140 18.791981 13.487683
H 12.406558 20.135019 13.303622
O 9.527587 13.815134 9.467046
H 9.800657 13.028228 8.926019
H 8.988419 13.479781 10.230132
O 11.679959 15.294012 10.212818
H 10.896306 14.732998 9.981696
H 12.458732 14.720797 9.988436
O 11.682516 17.494841 8.650160
H 11.675195 16.650879 9.177360
H 11.543657 18.236078 9.298324
O 13.689522 21.078796 9.586849
H 14.282026 20.524406 9.003292
H 12.935035 20.493263 9.850390
O 11.496015 19.619789 10.284281
H 11.511585 19.549023 11.273492
H 10.752567 20.230536 10.039448
O 15.160033 12.944796 11.671477
H 16.032230 13.424005 11.662878
H 15.305515 11.966160 11.664969
O 5.764798 14.475499 11.636036

```

|   |           |           |           |
|---|-----------|-----------|-----------|
| H | 6.611896  | 13.957712 | 11.619535 |
| H | 5.745044  | 14.999909 | 12.481158 |
| O | 17.384798 | 14.475499 | 11.636036 |
| H | 18.231895 | 13.957712 | 11.619535 |
| H | 17.365044 | 14.999909 | 12.481158 |
| O | 8.059400  | 13.033573 | 11.593623 |
| H | 7.956679  | 12.046919 | 11.625229 |
| H | 8.641445  | 13.276547 | 12.362518 |
| O | 15.180717 | 21.855593 | 11.678797 |
| H | 16.039667 | 21.355003 | 11.677984 |
| H | 14.661070 | 21.540110 | 10.890729 |
| O | 5.826965  | 20.353127 | 11.685769 |
| H | 5.711579  | 19.721231 | 12.443626 |
| H | 5.851135  | 19.814308 | 10.852731 |
| O | 17.446964 | 20.353127 | 11.685769 |
| H | 17.331579 | 19.721231 | 12.443626 |
| H | 17.471134 | 19.814308 | 10.852731 |
| O | 8.018846  | 21.944138 | 11.638476 |
| H | 7.180928  | 21.416010 | 11.692625 |
| H | 8.573236  | 21.641088 | 12.406093 |
| O | 7.907061  | 19.622345 | 15.225105 |
| H | 8.408581  | 18.832649 | 15.559645 |
| H | 7.117018  | 19.267818 | 14.737414 |
| O | 9.318891  | 17.470785 | 16.043154 |
| H | 10.190043 | 17.468927 | 15.561853 |
| H | 9.476459  | 17.490889 | 17.020163 |
| O | 15.260314 | 15.310280 | 15.393246 |
| H | 14.688958 | 14.746012 | 14.799813 |
| H | 15.541518 | 14.724632 | 16.146570 |
| O | 13.758429 | 17.433022 | 16.121122 |
| H | 14.325485 | 16.651228 | 15.892442 |
| H | 14.338848 | 18.209702 | 15.899646 |
| O | 7.968996  | 15.403123 | 7.957725  |
| H | 8.555574  | 14.808993 | 8.505259  |
| H | 7.225548  | 15.670151 | 8.558595  |
| O | 9.415802  | 17.504135 | 7.124803  |
| H | 10.276263 | 17.506924 | 7.620047  |
| H | 8.906846  | 16.715021 | 7.456670  |
| O | 15.312487 | 19.616768 | 8.051382  |
| H | 14.842807 | 18.814407 | 7.691510  |
| H | 16.100323 | 19.283274 | 8.558014  |
| O | 13.952483 | 17.468115 | 7.214161  |
| H | 13.084817 | 17.495886 | 7.696856  |
| H | 13.783760 | 17.444757 | 6.237848  |
| O | 5.722850  | 18.760374 | 13.870097 |
| H | 5.699959  | 17.776392 | 13.766679 |
| H | 4.981843  | 19.006252 | 14.484911 |
| O | 17.342850 | 18.760374 | 13.870097 |
| H | 17.319960 | 17.776392 | 13.766679 |
| H | 16.601843 | 19.006252 | 14.484911 |
| O | 5.870192  | 18.849266 | 9.419637  |
| H | 5.891456  | 17.865982 | 9.534559  |
| H | 6.630372  | 19.090149 | 8.829341  |
| O | 17.490192 | 18.849266 | 9.419637  |
| H | 17.511456 | 17.865982 | 9.534559  |
| H | 18.250372 | 19.090149 | 8.829341  |
| O | 5.743534  | 16.006201 | 13.851737 |
| H | 4.982656  | 15.767178 | 14.443311 |
| H | 6.548683  | 15.772756 | 14.382306 |
| O | 17.363535 | 16.006201 | 13.851737 |
| H | 16.602655 | 15.767178 | 14.443311 |
| H | 18.168682 | 15.772756 | 14.382306 |
| O | 5.852413  | 16.120193 | 9.486684  |



|   |           |           |           |
|---|-----------|-----------|-----------|
| H | 5.831265  | 15.594970 | 10.330645 |
| H | 5.060859  | 15.818306 | 8.965992  |
| O | 17.472412 | 16.120193 | 9.486684  |
| H | 17.451265 | 15.594970 | 10.330645 |
| H | 16.680859 | 15.818306 | 8.965992  |
| O | 9.456588  | 21.194067 | 9.484128  |
| H | 8.902895  | 20.610510 | 8.891508  |
| H | 8.867803  | 21.465393 | 10.237220 |
| O | 13.809557 | 13.777021 | 9.508065  |
| H | 13.465024 | 12.977332 | 9.024905  |
| H | 14.286790 | 13.437252 | 10.312053 |
| O | 13.774464 | 21.046957 | 13.838955 |
| H | 13.423308 | 21.844788 | 14.316770 |
| H | 14.265409 | 21.383007 | 13.043334 |
| O | 9.528749  | 13.745182 | 13.719037 |
| H | 8.934502  | 14.300502 | 14.299340 |
| H | 10.278006 | 14.335478 | 13.448872 |
| O | 15.376978 | 15.302029 | 7.996535  |
| H | 14.803764 | 14.718473 | 8.573120  |
| H | 14.808877 | 16.066626 | 7.719747  |
| O | 7.958538  | 19.638845 | 7.903343  |
| H | 8.491780  | 18.866697 | 7.580191  |
| H | 7.615051  | 20.121193 | 7.105398  |
| O | 15.284483 | 19.517183 | 15.418810 |
| H | 14.718938 | 20.081800 | 14.818754 |
| H | 15.548373 | 20.106436 | 16.172018 |
| O | 7.946569  | 15.268912 | 15.259965 |
| H | 8.427870  | 16.069880 | 15.595434 |
| H | 7.612959  | 14.784823 | 16.063023 |
| C | 8.652136  | 17.687614 | 11.808593 |
| H | 9.529097  | 17.834261 | 11.174838 |
| H | 8.334445  | 18.646149 | 12.223078 |
| H | 7.836993  | 17.267900 | 11.214811 |
| H | 8.896969  | 16.997852 | 12.619204 |
| C | 14.441220 | 17.706787 | 11.469870 |
| H | 15.368496 | 17.181332 | 11.228871 |
| H | 14.647475 | 18.769205 | 11.615584 |
| H | 13.729146 | 17.577108 | 10.652519 |
| H | 14.008840 | 17.291954 | 12.382853 |
